# Supplementary material for: Association of Normal-Weight Central Obesity With All-Cause and Cause-Specific Mortality Among Postmenopausal Women
Source: PubMed Central journal article supplement (PMC6659146; doi:10.1001/jamanetworkopen.2019.7337), 2019-07-24
Supplement: jamanetwopen-2-e197337-s001.pdf [file jamanetwopen-2-e197337-s001.pdf]

## Supplementary Online Content

Sun Y, Liu B, Snetselaar LG, et al. Association of normal-weight central obesity with all-cause and cause-specific mortality among postmenopausal women. *JAMA Netw Open*. 2019;2(7):e197337. doi:10.1001/jamanetworkopen.2019.7337

**eTable 1.** Baseline BMI and WC Status in Association With All-Cause and Cause-Specific Mortality Among 89 950 Postmenopausal Women in the WHI OS

**eTable 2.** Baseline BMI and WC Status in Association With All-Cause and Cause-Specific Mortality Among 129 299 White Women in the WHI

**eTable 3.** Baseline BMI and WC Status in Association With All-Cause and Cause-Specific Mortality Among 138 322 Postmenopausal Women Without CVD, Cancer, and Diabetes at Baseline in the WHI

**eTable 4.** Baseline BMI and WHR Status in Association With All-Cause and Cause-Specific Mortality Among 156 624 Postmenopausal Women

This supplementary material has been provided by the authors to give readers additional information about their work.

**eTable 1. Baseline BMI and WC Status in Association With All-Cause and Cause-Specific Mortality Among 89 950 Postmenopausal Women in the WHI OS**

|                     | Normal weight (BMI 18.5-24.9 kg/m <sup>2</sup> ) |                         | Overweight (BMI 25.0-29.9 kg/m <sup>2</sup> ) |                         | Obesity (BMI ≥30 kg/m <sup>2</sup> ) |                         |
|---------------------|--------------------------------------------------|-------------------------|-----------------------------------------------|-------------------------|--------------------------------------|-------------------------|
|                     | Normal WC (≤88 cm)                               | High WC (>88 cm)        | Normal WC (≤88 cm)                            | High WC (>88 cm)        | Normal WC (≤88 cm)                   | High WC (>88 cm)        |
| No. of participants | 35,242                                           | 858                     | 20,938                                        | 10,037                  | 2,633                                | 20,242                  |
| Any cause (n)       | 9,370                                            | 361                     | 5,275                                         | 3,661                   | 613                                  | 6,827                   |
| model 1             | 1.00(ref)                                        | <b>1.44(1.30, 1.60)</b> | <b>0.94(0.91, 0.97)</b>                       | <b>1.29(1.24, 1.34)</b> | <b>0.92(0.85, 0.99)</b>              | <b>1.47(1.43, 1.52)</b> |
| model 2             | 1.00(ref)                                        | <b>1.40(1.26, 1.55)</b> | <b>0.92(0.89, 0.95)</b>                       | <b>1.22(1.17, 1.27)</b> | <b>0.88(0.81, 0.96)</b>              | <b>1.36(1.32, 1.40)</b> |
| model 3             | 1.00(ref)                                        | <b>1.30(1.17, 1.44)</b> | <b>0.92(0.89, 0.95)</b>                       | <b>1.17(1.12, 1.21)</b> | <b>0.89(0.82, 0.97)</b>              | <b>1.32(1.28, 1.37)</b> |
| CVD (n)             | 2,478                                            | 91                      | 1,535                                         | 1,143                   | 195                                  | 2,227                   |
| model 1             | 1.00(ref)                                        | <b>1.31(1.06, 1.62)</b> | 1.03(0.96, 1.10)                              | <b>1.46(1.36, 1.56)</b> | 1.09(0.94, 1.26)                     | <b>1.82(1.72, 1.93)</b> |
| model 2             | 1.00(ref)                                        | <b>1.27(1.03, 1.56)</b> | 0.99(0.93, 1.06)                              | <b>1.36(1.27, 1.46)</b> | 1.03(0.89, 1.19)                     | <b>1.64(1.54, 1.74)</b> |
| model 3             | 1.00(ref)                                        | 1.19(0.97, 1.47)        | 0.99(0.93, 1.06)                              | <b>1.31(1.22, 1.40)</b> | 1.04(0.90, 1.20)                     | <b>1.59(1.49, 1.69)</b> |
| Cancer (n)          | 2,514                                            | 85                      | 1,435                                         | 940                     | 158                                  | 1,749                   |
| model 1             | 1.00(ref)                                        | <b>1.35(1.09, 1.68)</b> | 0.96(0.90, 1.02)                              | <b>1.28(1.19, 1.38)</b> | 0.87(0.74, 1.02)                     | <b>1.32(1.24, 1.41)</b> |
| model 2             | 1.00(ref)                                        | <b>1.32(1.06, 1.63)</b> | 0.94(0.88, 1.01)                              | <b>1.24(1.15, 1.33)</b> | <b>0.85(0.72, 0.99)</b>              | <b>1.25(1.18, 1.34)</b> |
| model 3             | 1.00(ref)                                        | 1.20(0.97, 1.49)        | 0.95(0.89, 1.02)                              | <b>1.18(1.10, 1.28)</b> | 0.88(0.75, 1.04)                     | <b>1.24(1.17, 1.33)</b> |
| Other causes (n)    | 4,378                                            | 185                     | 2,305                                         | 1,578                   | 260                                  | 2,851                   |
| model 1             | 1.00(ref)                                        | <b>1.57(1.35, 1.82)</b> | <b>0.88(0.84, 0.93)</b>                       | <b>1.20(1.13, 1.27)</b> | <b>0.85(0.75, 0.97)</b>              | <b>1.38(1.32, 1.45)</b> |
| model 2             | 1.00(ref)                                        | <b>1.53(1.32, 1.77)</b> | <b>0.86(0.82, 0.90)</b>                       | <b>1.14(1.07, 1.20)</b> | <b>0.81(0.72, 0.92)</b>              | <b>1.27(1.21, 1.33)</b> |
| model 3             | 1.00(ref)                                        | <b>1.42(1.23, 1.65)</b> | <b>0.85(0.81, 0.90)</b>                       | <b>1.08(1.02, 1.15)</b> | <b>0.81(0.72, 0.92)</b>              | <b>1.22(1.16, 1.28)</b> |

Model 1: age at baseline and race/ethnicity.

Model 2: model 1+ education, income, NSES, unopposed estrogen usage status, and estrogen + progesterone usage status.

Model 3: model 2 + smoking status, physical activity, total energy intake, and AHEI-2010 score.

Bold values are statistically significant at  $p < 0.05$ .

**eTable 2. Baseline BMI and WC Status in Association With All-Cause and Cause-Specific Mortality Among 129 299 White Women in the WHI**

| Causes of death     | Normal weight (BMI 18.5-24.9 kg/m <sup>2</sup> ) |                         | Overweight (BMI 25.0-29.9 kg/m <sup>2</sup> ) |                         | Obesity (BMI ≥30 kg/m <sup>2</sup> ) |                         |
|---------------------|--------------------------------------------------|-------------------------|-----------------------------------------------|-------------------------|--------------------------------------|-------------------------|
|                     | Normal WC (≤88 cm)                               | High WC (>88 cm)        | Normal WC (≤88 cm)                            | High WC (>88 cm)        | Normal WC (≤88 cm)                   | High WC (>88 cm)        |
| No. of participants | 46,031                                           | 1223                    | 29,833                                        | 15,754                  | 3,544                                | 32,914                  |
| Any cause (n)       | 12,284                                           | 500                     | 7,465                                         | 5,512                   | 818                                  | 10,763                  |
| model 1             | 1.00(ref)                                        | <b>1.42(1.30, 1.55)</b> | <b>0.92(0.90, 0.95)</b>                       | <b>1.23(1.19, 1.27)</b> | <b>0.92(0.85, 0.98)</b>              | <b>1.39(1.35, 1.43)</b> |
| model 2             | 1.00(ref)                                        | <b>1.38(1.26, 1.51)</b> | <b>0.91(0.88, 0.94)</b>                       | <b>1.19(1.16, 1.23)</b> | <b>0.89(0.83, 0.95)</b>              | <b>1.32(1.28, 1.35)</b> |
| model 3             | 1.00(ref)                                        | <b>1.30(1.19, 1.43)</b> | <b>0.92(0.89, 0.94)</b>                       | <b>1.16(1.12, 1.19)</b> | <b>0.92(0.85, 0.98)</b>              | <b>1.31(1.27, 1.34)</b> |
| CVD (n)             | 3,266                                            | 135                     | 2,127                                         | 1,660                   | 250                                  | 3,369                   |
| model 1             | 1.00(ref)                                        | <b>1.39(1.17, 1.65)</b> | 1.00(0.94, 1.05)                              | <b>1.37(1.29, 1.45)</b> | 1.08(0.95, 1.23)                     | <b>1.69(1.61, 1.77)</b> |
| model 2             | 1.00(ref)                                        | <b>1.33(1.12, 1.58)</b> | 0.97(0.92, 1.02)                              | <b>1.29(1.22, 1.37)</b> | 1.02(0.90, 1.16)                     | <b>1.55(1.47, 1.62)</b> |
| model 3             | 1.00(ref)                                        | <b>1.27(1.07, 1.51)</b> | 0.97(0.92, 1.02)                              | <b>1.25(1.18, 1.33)</b> | 1.05(0.92, 1.19)                     | <b>1.52(1.45, 1.60)</b> |
| Cancer (n)          | 3,294                                            | 115                     | 2,084                                         | 1,457                   | 213                                  | 2,874                   |
| model 1             | 1.00(ref)                                        | <b>1.28(1.07, 1.55)</b> | 0.96(0.91, 1.01)                              | <b>1.25(1.18, 1.33)</b> | <b>0.86(0.75, 0.99)</b>              | <b>1.30(1.24, 1.37)</b> |
| model 2             | 1.00(ref)                                        | <b>1.25(1.04, 1.51)</b> | 0.95(0.90, 1.01)                              | <b>1.22(1.15, 1.30)</b> | <b>0.84(0.74, 0.97)</b>              | <b>1.25(1.19, 1.31)</b> |
| model 3             | 1.00(ref)                                        | 1.17(0.97, 1.40)        | 0.98(0.92, 1.03)                              | <b>1.19(1.12, 1.27)</b> | 0.90(0.78, 1.03)                     | <b>1.27(1.21, 1.34)</b> |
| Other causes (n)    | 5,724                                            | 250                     | 3,254                                         | 2,395                   | 355                                  | 4,520                   |
| model 1             | 1.00(ref)                                        | <b>1.52(1.34, 1.73)</b> | <b>0.86(0.83, 0.90)</b>                       | <b>1.15(1.10, 1.21)</b> | <b>0.86(0.77, 0.96)</b>              | <b>1.29(1.24, 1.34)</b> |
| model 2             | 1.00(ref)                                        | <b>1.49(1.31, 1.69)</b> | <b>0.85(0.82, 0.89)</b>                       | <b>1.13(1.07, 1.18)</b> | <b>0.84(0.75, 0.93)</b>              | <b>1.24(1.19, 1.29)</b> |
| model 3             | 1.00(ref)                                        | <b>1.41(1.24, 1.60)</b> | <b>0.85(0.82, 0.89)</b>                       | <b>1.09(1.03, 1.14)</b> | <b>0.85(0.77, 0.95)</b>              | <b>1.21(1.16, 1.26)</b> |

Model 1: age at baseline.

Model 2: model 1+ education, income, NSES, unopposed estrogen usage status, and estrogen + progesterone usage status.

Model 3: model 2 + smoking status, physical activity, total energy intake, and AHEI-2010 score.

Bold values are statistically significant at  $p < 0.05$ .

**eTable 3. Baseline BMI and WC Status in Association With All-Cause and Cause-Specific Mortality Among 138 322 Postmenopausal Women Without CVD, Cancer, and Diabetes at Baseline in the WHI**

| Causes of death     | Normal weight (BMI 18.5-24.9 kg/m <sup>2</sup> ) |                         | Overweight (BMI 25.0-29.9 kg/m <sup>2</sup> ) |                         | Obesity (BMI ≥30 kg/m <sup>2</sup> ) |                         |
|---------------------|--------------------------------------------------|-------------------------|-----------------------------------------------|-------------------------|--------------------------------------|-------------------------|
|                     | Normal WC (≤88 cm)                               | High WC (>88 cm)        | Normal WC (≤88 cm)                            | High WC (>88 cm)        | Normal WC (≤88 cm)                   | High WC (>88 cm)        |
| No. of participants | 48,862                                           | 1,200                   | 33,297                                        | 15,782                  | 4,448                                | 34,733                  |
| Any cause (n)       | 11,847                                           | 444                     | 7,380                                         | 4,898                   | 893                                  | 9,507                   |
| model 1             | 1.00(ref)                                        | <b>1.38(1.26, 1.52)</b> | <b>0.91(0.89, 0.94)</b>                       | <b>1.20(1.16, 1.24)</b> | <b>0.92(0.86, 0.99)</b>              | <b>1.29(1.25, 1.32)</b> |
| model 2             | 1.00(ref)                                        | <b>1.34(1.22, 1.48)</b> | <b>0.90(0.87, 0.93)</b>                       | <b>1.16(1.12, 1.20)</b> | <b>0.90(0.84, 0.96)</b>              | <b>1.22(1.19, 1.26)</b> |
| model 3             | 1.00(ref)                                        | <b>1.26(1.15, 1.39)</b> | <b>0.91(0.88, 0.93)</b>                       | <b>1.12(1.08, 1.16)</b> | <b>0.93(0.86, 0.99)</b>              | <b>1.21(1.18, 1.25)</b> |
| CVD (n)             | 2,976                                            | 104                     | 2,019                                         | 1,389                   | 266                                  | 2,785                   |
| model 1             | 1.00(ref)                                        | <b>1.24(1.02, 1.51)</b> | 1.00(0.94, 1.05)                              | <b>1.31(1.23, 1.40)</b> | 1.11(0.98, 1.26)                     | <b>1.53(1.46, 1.62)</b> |
| model 2             | 1.00(ref)                                        | 1.19(0.98, 1.45)        | 0.97(0.91, 1.02)                              | <b>1.25(1.17, 1.33)</b> | 1.06(0.93, 1.20)                     | <b>1.41(1.34, 1.49)</b> |
| model 3             | 1.00(ref)                                        | 1.14(0.94, 1.39)        | 0.97(0.92, 1.03)                              | <b>1.21(1.14, 1.29)</b> | 1.08(0.95, 1.22)                     | <b>1.40(1.32, 1.48)</b> |
| Cancer (n)          | 3,332                                            | 115                     | 281                                           | 1,403                   | 258                                  | 2,797                   |
| model 1             | 1.00(ref)                                        | <b>1.35(1.12, 1.63)</b> | 0.96(0.91, 1.01)                              | <b>1.26(1.18, 1.34)</b> | 0.90(0.79, 1.02)                     | <b>1.26(1.20, 1.33)</b> |
| model 2             | 1.00(ref)                                        | <b>1.32(1.10, 1.59)</b> | <b>0.95(0.90, 0.99)</b>                       | <b>1.23(1.15, 1.31)</b> | 0.89(0.78, 1.01)                     | <b>1.21(1.15, 1.27)</b> |
| model 3             | 1.00(ref)                                        | <b>1.22(1.02, 1.47)</b> | 0.97(0.92, 1.02)                              | <b>1.20(1.12, 1.28)</b> | 0.94(0.83, 1.07)                     | <b>1.24(1.17, 1.30)</b> |
| Other causes (n)    | 5,539                                            | 225                     | 3180                                          | 2,106                   | 369                                  | 3,925                   |
| model 1             | 1.00(ref)                                        | <b>1.48(1.30, 1.69)</b> | <b>0.85(0.81, 0.88)</b>                       | <b>1.10(1.05, 1.16)</b> | <b>0.84(0.76, 0.94)</b>              | <b>1.18(1.13, 1.23)</b> |
| model 2             | 1.00(ref)                                        | <b>1.45(1.27, 1.66)</b> | <b>0.83(0.80, 0.87)</b>                       | <b>1.08(1.02, 1.13)</b> | <b>0.82(0.74, 0.91)</b>              | <b>1.14(1.09, 1.19)</b> |
| model 3             | 1.00(ref)                                        | <b>1.36(1.19, 1.56)</b> | <b>0.83(0.80, 0.87)</b>                       | 1.03(0.98, 1.09)        | <b>0.83(0.75, 0.93)</b>              | <b>1.11(1.06, 1.16)</b> |

Model 1: age at baseline and race/ethnicity.

Model 2: model 1+ education, income, NSES, unopposed estrogen usage status, and estrogen + progesterone usage status.

Model 3: model 2 + smoking status, physical activity, total energy intake, and AHEI-2010 score.

Bold values are statistically significant at  $p < 0.05$ .

**eTable 4. Baseline BMI and WHR Status in Association With All-Cause and Cause-Specific Mortality Among 156 624 Postmenopausal Women**

| Causes of death     | Normal weight (BMI 18.5-24.9 kg/m <sup>2</sup> ) |                         | Overweight (BMI 25.0-29.9 kg/m <sup>2</sup> ) |                         | Obesity (BMI ≥30 kg/m <sup>2</sup> ) |                         |
|---------------------|--------------------------------------------------|-------------------------|-----------------------------------------------|-------------------------|--------------------------------------|-------------------------|
|                     | Normal WHR (<0.85)                               | High WHR (≥0.85)        | Normal WHR (<0.85)                            | High WHR (≥0.85)        | Normal WHR (<0.85)                   | High WHR (≥0.85)        |
| No. of participants | 48498                                            | 5627                    | 39007                                         | 15902                   | 25093                                | 22497                   |
| Any cause (n)       | 11992                                            | 2288                    |                                               | 5442                    | 6385                                 | 7582                    |
| model 1             | 1.00(ref)                                        | <b>1.43(1.37, 1.49)</b> | 0.98(0.95, 1.01)                              | <b>1.29(1.25, 1.33)</b> | <b>1.21(1.17, 1.24)</b>              | <b>1.60(1.56, 1.65)</b> |
| model 2             | 1.00(ref)                                        | <b>1.40(1.34, 1.46)</b> | <b>0.96(0.93, 0.99)</b>                       | <b>1.24(1.20, 1.28)</b> | <b>1.15(1.12, 1.19)</b>              | <b>1.50(1.46, 1.55)</b> |
| model 3             | 1.00(ref)                                        | <b>1.33(1.27, 1.39)</b> | <b>0.96(0.93, 0.98)</b>                       | <b>1.20(1.16, 1.24)</b> | <b>1.16(1.12, 1.19)</b>              | <b>1.47(1.42, 1.51)</b> |
| CVD (n)             | 3163                                             | 657                     | 2682                                          | 1806                    | 2077                                 | 2580                    |
| model 1             | 1.00(ref)                                        | <b>1.44(1.33, 1.57)</b> | <b>1.06(1.01, 1.11)</b>                       | <b>1.47(1.39, 1.56)</b> | <b>1.45(1.37, 1.53)</b>              | <b>1.98(1.88, 2.08)</b> |
| model 2             | 1.00(ref)                                        | <b>1.40(1.29, 1.53)</b> | 1.02(0.97, 1.08)                              | <b>1.38(1.31, 1.47)</b> | <b>1.34(1.27, 1.42)</b>              | <b>1.79(1.70, 1.89)</b> |
| model 3             | 1.00(ref)                                        | <b>1.33(1.22, 1.45)</b> | 1.01(0.96, 1.07)                              | <b>1.33(1.26, 1.42)</b> | <b>1.33(1.25, 1.41)</b>              | <b>1.74(1.65, 1.84)</b> |
| Cancer (n)          | 3289                                             | 552                     | 2670                                          | 1446                    | 1812                                 | 2059                    |
| model 1             | 1.00(ref)                                        | <b>1.38(1.26, 1.51)</b> | 1.01(0.96, 1.06)                              | <b>1.28(1.21, 1.36)</b> | <b>1.14(1.08, 1.21)</b>              | <b>1.46(1.38, 1.54)</b> |
| model 2             | 1.00(ref)                                        | <b>1.36(1.24, 1.48)</b> | 1.00(0.95, 1.05)                              | <b>1.25(1.17, 1.33)</b> | <b>1.11(1.04, 1.17)</b>              | <b>1.39(1.32, 1.47)</b> |
| model 3             | 1.00(ref)                                        | <b>1.26(1.14, 1.38)</b> | 1.01(0.96, 1.07)                              | <b>1.22(1.14, 1.30)</b> | <b>1.15(1.08, 1.23)</b>              | <b>1.40(1.32, 1.48)</b> |
| Other causes (n)    | 5540                                             | 1079                    | 4042                                          | 2424                    | 2735                                 | 3225                    |
| model 1             | 1.00(ref)                                        | <b>1.45(1.36, 1.55)</b> | <b>0.91(0.88, 0.95)</b>                       | <b>1.20(1.14, 1.26)</b> | <b>1.12(1.07, 1.17)</b>              | <b>1.49(1.42, 1.55)</b> |
| model 2             | 1.00(ref)                                        | <b>1.43(1.34, 1.53)</b> | <b>0.90(0.87, 0.94)</b>                       | <b>1.16(1.10, 1.22)</b> | <b>1.08(1.03, 1.13)</b>              | <b>1.41(1.35, 1.48)</b> |
| model 3             | 1.00(ref)                                        | <b>1.37(1.28, 1.47)</b> | <b>0.89(0.86, 0.93)</b>                       | <b>1.11(1.06, 1.17)</b> | <b>1.06(1.01, 1.12)</b>              | <b>1.36(1.29, 1.42)</b> |

Abbreviation: WHR, waist-to-hip ratio.

Model 1: age at baseline and race/ethnicity.

Model 2: model 1+ education, income, OS/CT, NSES, unopposed estrogen usage status, and estrogen + progesterone usage status.

Model 3: model 2 + smoking status, physical activity, total energy intake, and AHEI-2010 score.

Bold values are statistically significant at  $p < 0.05$ .
